# Supplementary material for: Synergistically enhanced iron and zinc bimetallic sites as an advanced ORR electrocatalyst for flow liquid rechargeable Zn–air batteries
Source: Royal Society of Chemistry journal article supplement (doi:10.1039/d1ta09678h), 2021-12-31
Supplement: d1ta09678h1.pdf [file d1ta09678h1.pdf]

## Supporting Information

# **Synergistically Enhanced Iron and Zinc Bimetallic Sites as an Advanced ORR Electrocatalyst for Flow Liquid Rechargeable Zn-air Batteries**

Zhi-Da Wang,<sup>a</sup> Song Liang,<sup>\*a</sup> Cheng-Kun Bai,<sup>a</sup> Zhong-feng Guo,<sup>a</sup> Guo-Long Lu,<sup>a</sup> Hang Sun,<sup>a</sup> Zhen-Ning Liu <sup>\*a</sup> and Hong-Ying Zang <sup>\*b</sup>

<sup>a</sup> Key Laboratory of Bionic Engineering (Ministry of Education), College of Biological and Agricultural Engineering, Jilin University, Changchun, 130022, China. E-mail: Songliang@jlu.edu.cn; liu\_zhenning@jlu.edu.cn

<sup>b</sup> Key Laboratory of Polyoxometalate Science of the Ministry of Education, Faculty of Chemistry, Northeast Normal University, Changchun, 130024, China. E-mail: zanghy100@nenu.edu.cn

## Supplementary Text

### Experimental section

#### Synthetic optimization

For comparison, the TA/Fe(III)/PI/MWCNTs was then carbonized at different temperatures (700 and 900 °C), denoted as Fe-Zn/N/C/MWCNTs-700 and Fe-Zn/N/C/MWCNTs-900, respectively.

Besides, the TA/Fe(III)/PI/MWCNTs was then prepared at different amount of  $\text{Fe}(\text{NO}_3)_3 \cdot 9\text{H}_2\text{O}$  (100, 200, and 300 mg), and subsequently carbonization in the same way, denoted as Fe-Zn/N/C/MWCNTs-800-100, Fe-Zn/N/C/MWCNTs-800-200, and Fe-Zn/N/C/MWCNTs-800-400, respectively.

Meanwhile, Fe-Zn/N/MWCNTs-800, Fe-Zn/C/MWCNTs-800, Fe-Zn/N/C-800, or Fe/N/C/MWCNTs-800 were also prepared without TA, PI, MWCNTs, or molten-salt, respectively.

#### Materials Characterization

The morphology, structure, and composition of materials in this paper were systematically characterized by methods of Fourier Transform Infrared Spectrometer (FT-IR, Shimadzu, IR Affinity-1), X-ray diffraction (XRD, Shimadzu, 6100), Raman spectroscopy with a LabRAM HR high-resolution Raman spectrometer (Horiba-Jobin Yvon), scanning electron microscopy (SEM, Hitachi, SU-70), transmission electron microscopy (TEM, JEOL, JEM-2100F), X-ray photoelectron spectroscopy (XPS, VG ESCALAB MKII, Al-K $\alpha$  radiation), and inductively coupled plasma optical emission spectrometry (ICP-OES, Agilent 5110). The surface area, pore size, and pore-size distribution of the materials were measured by the Brunauer–Emmett–Teller (BET) nitrogen adsorption–desorption and Barrett–Joyner–Halenda (BJH) methods (ASAP 2020 M).

#### Electrochemical tests

The electrochemical experiments were carried out with a computer-controlled potentiostat (CHI 750E, Shanghai CH Instrument, China) using a three-electrode configuration with glassy carbon working electrode, graphite counter electrode, and corresponding reference electrode, respectively. An Ag/AgCl electrode (saturated KCl) was used as a reference electrode, a graphite plate was used as a counter electrode and the catalyst film coated a rotating ring-disk electrode (RRDE) with a glassy carbon disk (5.5 mm in diameter) and a Pt ring (inner/outer-ring diameter: 6.5/8.5 mm) were used as the working electrode, respectively.

Typically, 5 mg of catalyst was mixed with 50  $\mu\text{L}$  of Nafion solution (5 wt%), 400  $\mu\text{L}$  of isopropanol and 600  $\mu\text{L}$  of DI water and sonicated for 30 mins to form a homogeneous ink. Then, 10  $\mu\text{L}$  of the dispersion of homogeneous ink was loaded onto RRDE and dried naturally. For comparison, the Pt/C (20 wt% Pt) catalyst coated onto RRDE were used as the control group. The potentials were presented with respect to the reversible hydrogen electrode (RHE),  $E(\text{RHE}) = E(\text{Ag/AgCl/saturated KCl}) + 0.0591 \text{ pH} + 0.197$  in this paper.

All electrochemical measurements were performed at room temperature in 0.1 M KOH saturated with  $\text{O}_2$  or Ar for 30 min prior to the experiment and the gas flow was maintained during tests. Cyclic voltammetry (CV) tests were performed at a scan rate of  $10 \text{ mV} \cdot \text{s}^{-1}$ . Linear sweep voltammetry (LSV) tests were run at a scan rate of  $10 \text{ mV} \cdot \text{s}^{-1}$  at different rotation rates combined with the RRDE. The

apparent number of electrons transferred for ORR on the electrodes was also determined by the Koutecky-Levich equations given below:

$$\frac{1}{J} = \frac{1}{J_L} + \frac{1}{J_K} = \frac{1}{B\omega^{1/2}} + \frac{1}{J_K} \quad (1)$$

$$B = 0.62nFC_0(D_0)^{2/3}\nu^{-1/6} \quad (2)$$

in which  $J$  is the measured current density,  $J_K$  and  $J_L$  are the kinetic and diffusion-limiting current densities,  $\omega$  is electrode rotation rate,  $n$  is the overall number of electrons transferred in oxygen reduction,  $F$  is the Faraday constant ( $F = 96485 \text{ C mol}^{-1}$ ),  $C_0$  is the bulk concentration of  $\text{O}_2$ ,  $\nu$  is the kinematic viscosity of the electrolyte, and  $k$  is the electron transfer rate constant. The number of electrons transferred ( $n$ ) and  $J_K$  could be obtained from the slope and intercept of the Koutecky-Levich plots, respectively, and by using parameters  $C_0 = 1.2 \times 10^{-6} \text{ mol cm}^{-3}$ ,  $D_0 = 1.9 \times 10^{-5} \text{ cm}^2 \text{ s}^{-1}$ , and  $\nu = 0.01 \text{ cm}^2 \text{ s}^{-1}$  in 0.1 M KOH, 25 °C, 1 atm. For RRDE measurements, the curves were collected at a rotation rate of 1600 rpm.

For the Tafel slope,  $J_K$  was corrected through the diffusion current density ( $J_L$ ) from the Koutecky-Levich equation by:

$$J_K = \frac{J_L \times J}{J_L - J} \quad (3)$$

The  $\text{H}_2\text{O}_2\%$  and the electron transfer number ( $n$ ) were calculated as follows:

$$\text{HO}_2^- \% = 200 \times \frac{I_R/N}{I_D + I_R/N} \quad (4)$$

$$n = \frac{4I_D}{I_D + I_R/N} \quad (5)$$

where  $I_D$  is the disk current and  $I_R$  is the ring current, respectively, and  $N$  (0.37) is the collecting efficiency of the Pt ring.

The stability and methanol tolerance tests of the electrocatalysts were measured by chronoamperometric (CA) measurements with the potential holding at 0.5 V (vs. RHE) with a rotation rate of 1600 rpm in  $\text{O}_2$ -saturated corresponding solutions. CA measurements were also used to judge the stability of the catalyst. Methanol tolerance experiments were developed with CA measurements by adding 3 M methanol into  $\text{O}_2$ -saturated 0.1 M KOH at ca. 300 s.

To evaluate the OER catalytic activities of electrocatalysts, we used carbon paper as the working electrode substrate. In above ORR measurements, 200  $\mu\text{L}$  of homogeneous ink was coated onto a piece of carbon paper ( $1 \times 1 \text{ cm}^2$ ), and the amount of electrocatalysts on the carbon paper was about  $1 \text{ mg} \cdot \text{cm}^{-2}$ . The LSV tests were run in a 6.0 M KOH solution. And the stability tests were performed by CA measurements with the potential holding at 1.587 V (vs. RHE) in a Teflon (PTFE) cell containing the 6.0 M solutions. The overpotential at  $10 \text{ mA} \cdot \text{cm}^{-2}$  ( $\eta$ ) was calculated as follows:

$$\eta = E_{10} - 1.23 \quad (6)$$

where  $E_{10}$  is the OER polarization potential relative to the RHE at  $10 \text{ mA} \cdot \text{cm}^{-2}$  and the  $\text{O}_2/\text{H}_2\text{O}$  equilibrium potential is suggested as 1.23 V.

All the electrochemical tests were carried out at ambient temperature.

### **Assembly of flow liquid Rechargeable Zn-air batteries**

The home-made Zn-air battery was assembled to identify the performance of the Fe-Zn/N/C/MWCNTs-800 catalyst in practical applications. Briefly, a polished zinc plate was used as the anode, the electrocatalyst of Fe-Zn/N/C/MWCNTs-800 or 20% Pt/C ( $1.0 \text{ mg cm}^{-2}$ ) dispersed on the gas diffusion layer was used as the air cathode, and a solution of 6.0 M KOH containing 0.2 M  $\text{Zn(OAc)}_2$  was used as the electrolyte, respectively. Besides, the flowing rate of the electrolyte could be easily controlled by a circulating pump at  $3 \text{ mL min}^{-1}$ . The CHI 750E and multi-channel battery testing system (Land CT 2001a) electrochemistry workstation were adopted to test the discharge/charge performance and cycling stability of the Zn-air batteries at room temperature. The blue light emitting diode (LED) screen and the single bulb pattern (about 3 V) were commercially available.

## Supplementary Figures and captions

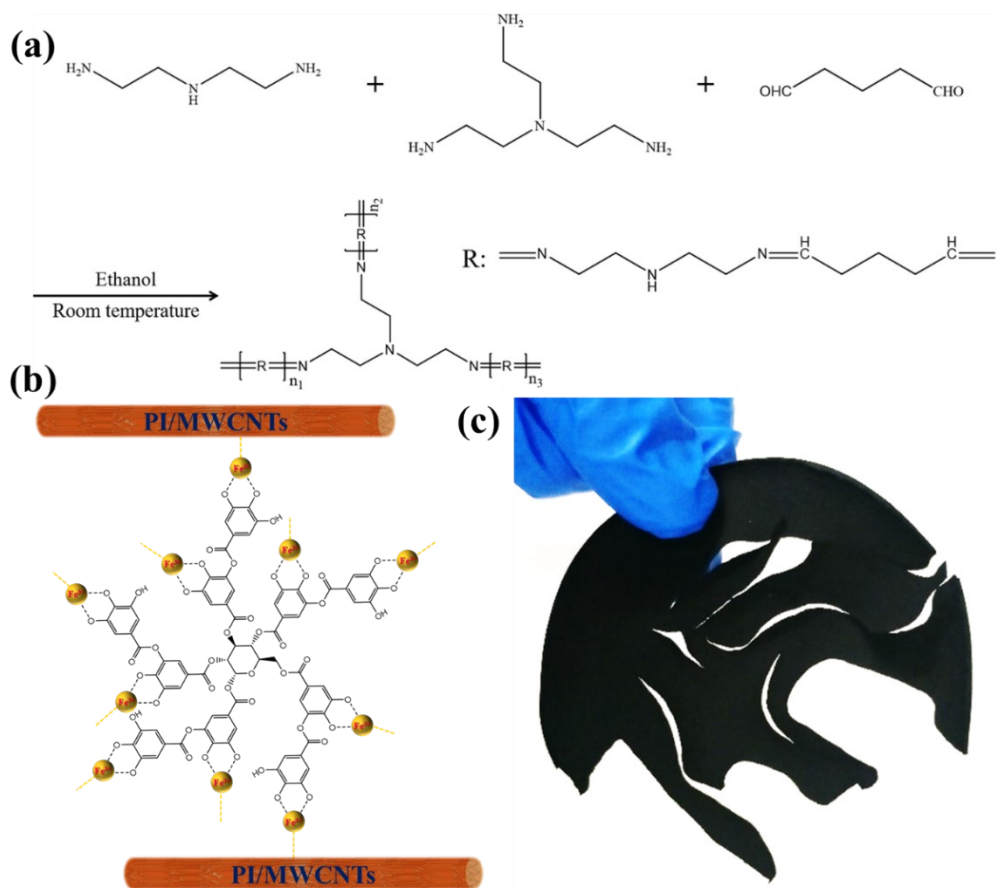

**Fig. S1.** (a) Schematic synthesis process of polyimine (PI). (b) The chemical structures and (c) the picture of TA-Fe-PI/MWCNTs composites.

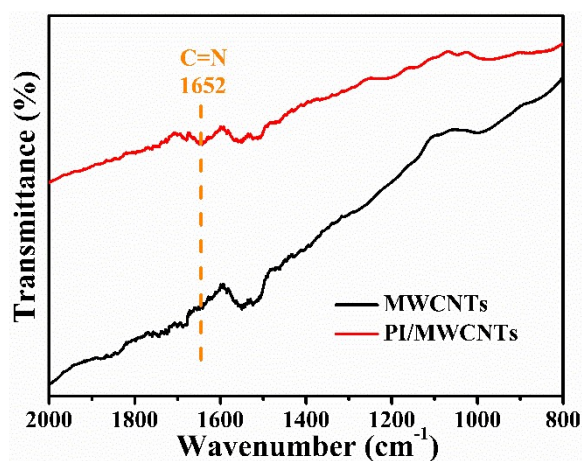

**Fig. S2.** FT-IR spectra of PI/MWCNTs composites and pure MWCNTs.

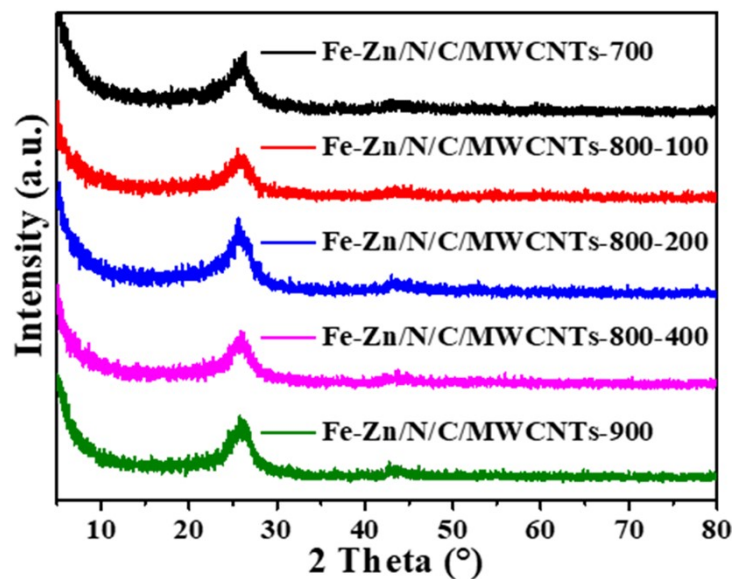

Fig. S3. XRD patterns of Fe-Zn/N/C/MWCNTs-700, Fe-Zn/N/C/MWCNTs-800-100, Fe-Zn/N/C/MWCNTs-800-200, Fe-Zn/N/C/MWCNTs-800-400, and Fe-Zn/N/C/MWCNTs-900.

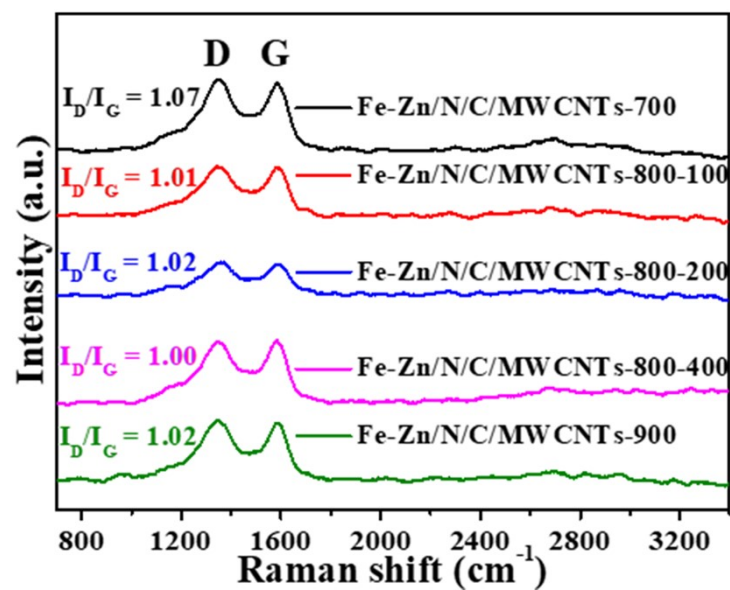

Fig. S4. Raman spectra of Fe-Zn/N/C/MWCNTs-700, Fe-Zn/N/C/MWCNTs-800-100, Fe-Zn/N/C/MWCNTs-800-200, Fe-Zn/N/C/MWCNTs-800-400, and Fe-Zn/N/C/MWCNTs-900.

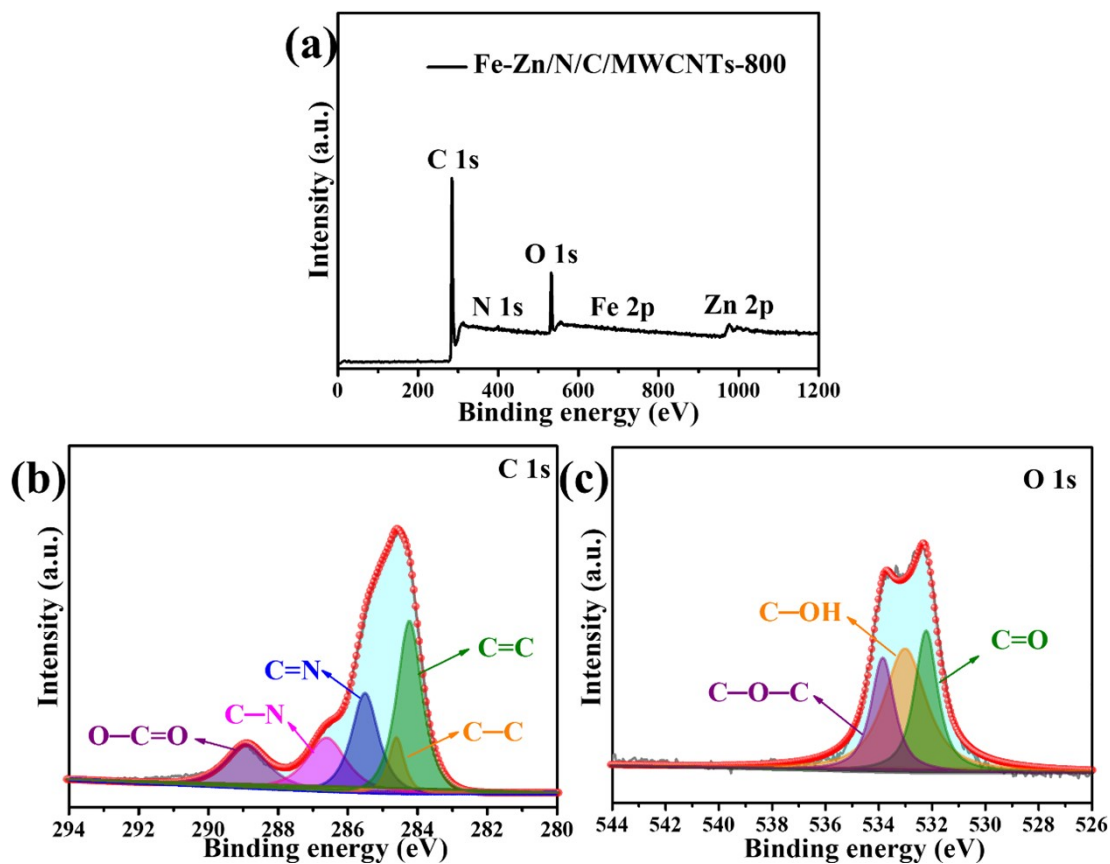

**Fig. S5.** High-resolution XPS spectra of Fe-Zn/N/C/MWCNTs-800 at (a) overall, (b) C 1s, and (c) O 1s region, respectively.

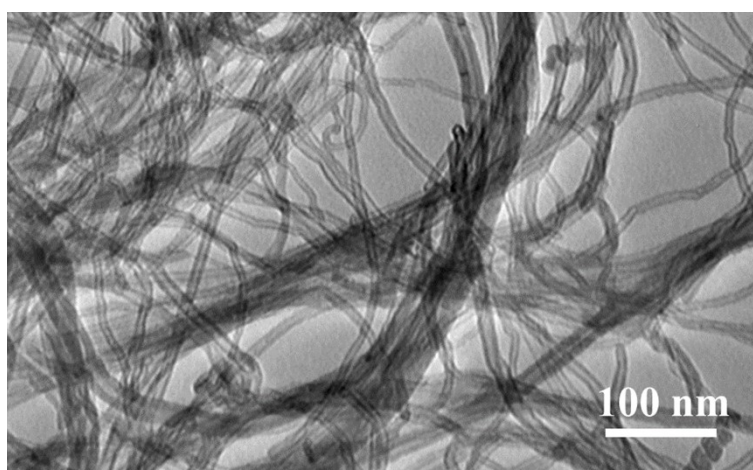

**Fig. S6.** TEM image of pure MWCNTs.

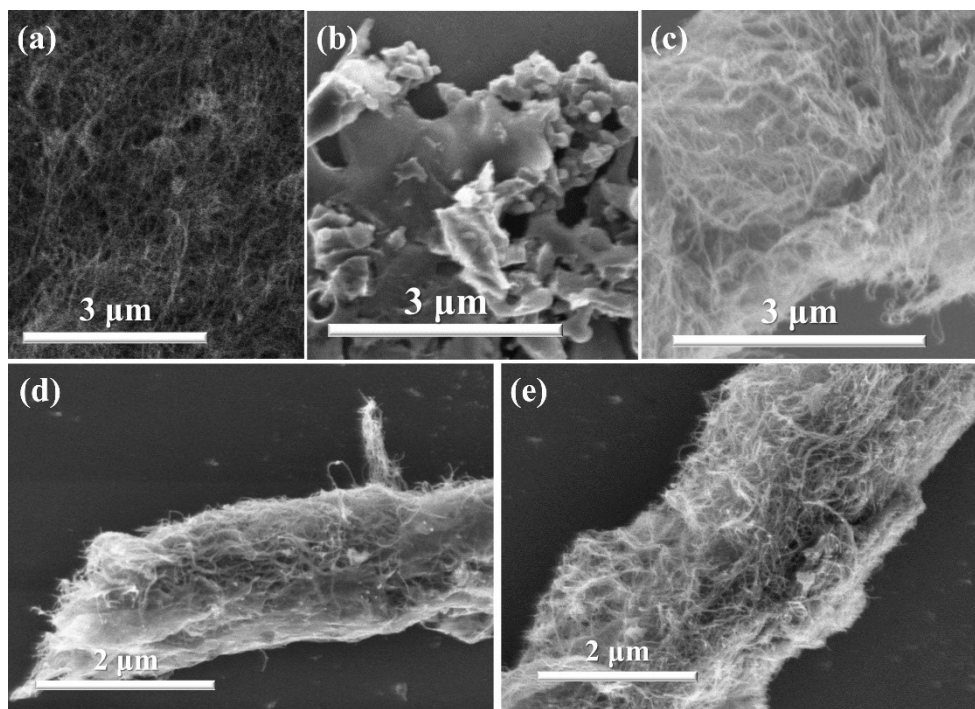

**Fig. S7.** SEM images of (a) MWCNTs, (b) Fe-Zn/N/C -800, (c) Fe-Zn/C/MWCNTs-800, (d) Fe-Zn/N/MWCNTs-800, and (e) Fe/N/C/MWCNTs-800.

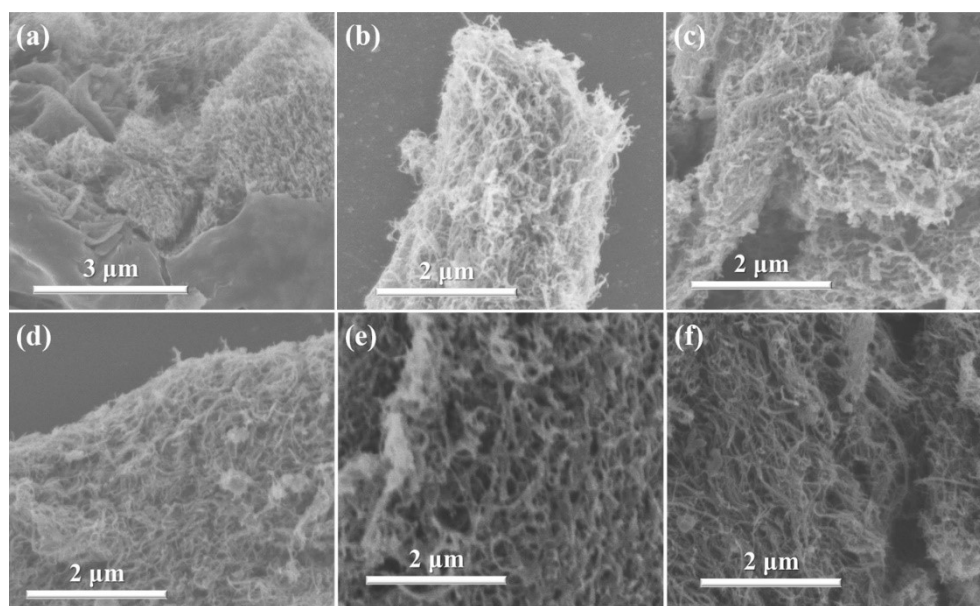

**Fig. S8.** SEM images of (a) Zn/N/C/MWCNTs-800, (b) Fe-Zn/N/C/MWCNTs-700, (c) Fe-Zn/N/C/MWCNTs-800-100, (d) Fe-Zn/N/C/MWCNTs-800-200, (e) Fe-Zn/N/C/MWCNTs-800-400, and (f) Fe-Zn/N/C/MWCNTs-900.



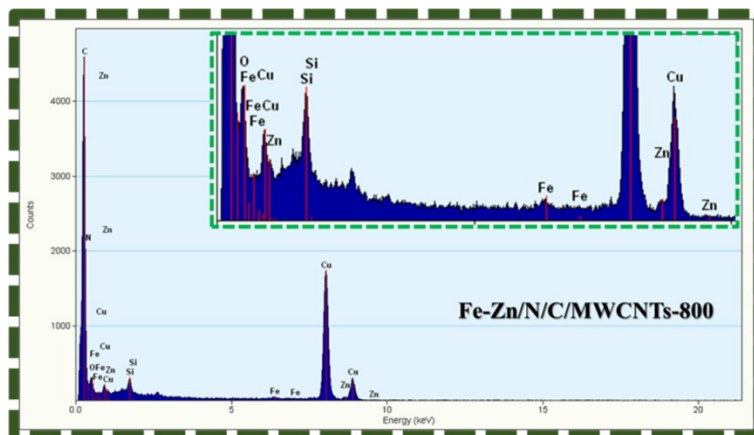

Fig. S9. EDX spectrum of Fe-Zn/N/C/MWCNTs-800.

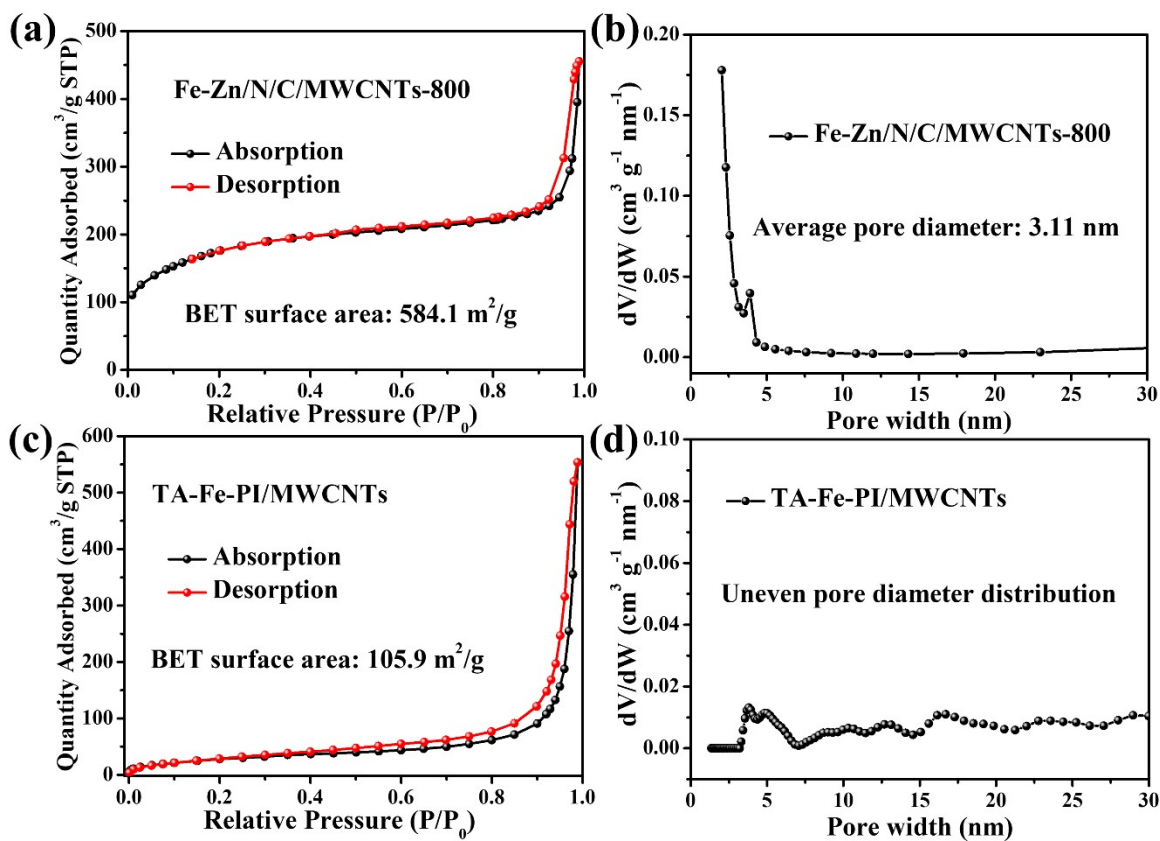

Fig. S10. (a)  $N_2$  adsorption-desorption isotherms and (b) the corresponding pore distribution curves of Fe-Zn/N/C/MWCNTs-800. (c)  $N_2$  adsorption-desorption isotherms and (d) the corresponding pore distribution curves of TA-Fe-PI/MWCNTs sample (before pyrolysis).

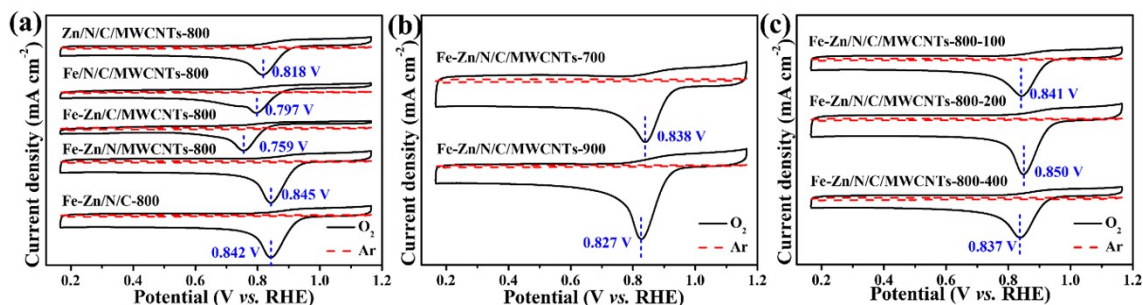

**Fig. S11.** Cyclic voltammety (CV) curves of (a) Zn/N/C/MWCNTs-800, Fe/N/C/MWCNTs-800, Fe-Zn/N/C/MWCNTs-800, Fe-Zn/N/C/MWCNTs-800, and Fe-Zn/N/C-800, (b) Fe-Zn/N/C/MWCNTs-700 and Fe-Zn/N/C/MWCNTs-900, and (c) Fe-Zn/N/C/MWCNTs-800-100, Fe-Zn/N/C/MWCNTs-800-200, and Fe-Zn/N/C/MWCNTs-800-400 for ORR measured in Ar- and O<sub>2</sub>- saturated 0.1 M KOH electrolyte.

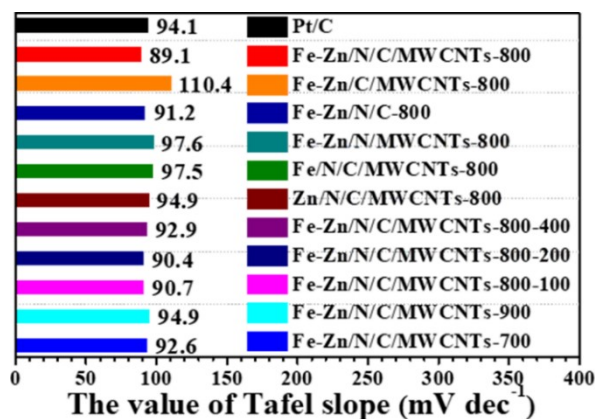

**Fig. S12.** The value of Tafel slope in this work.

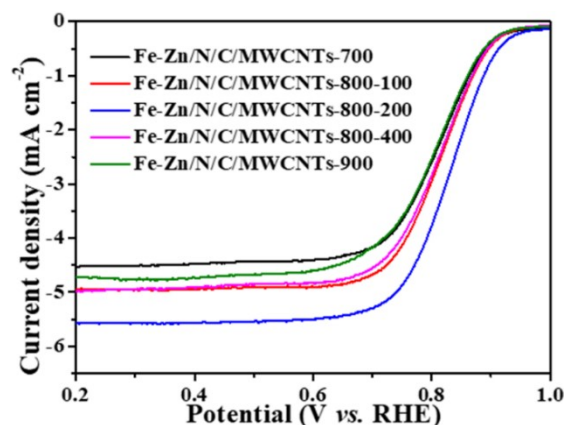

**Fig. S13.** Linear sweep voltammety (LSV) curves of Fe-Zn/N/C/MWCNTs-700, Fe-Zn/N/C/MWCNTs-800-100, Fe-Zn/N/C/MWCNTs-800-200, Fe-Zn/N/C/MWCNTs-800-400, and Fe-Zn/N/C/MWCNTs-900.

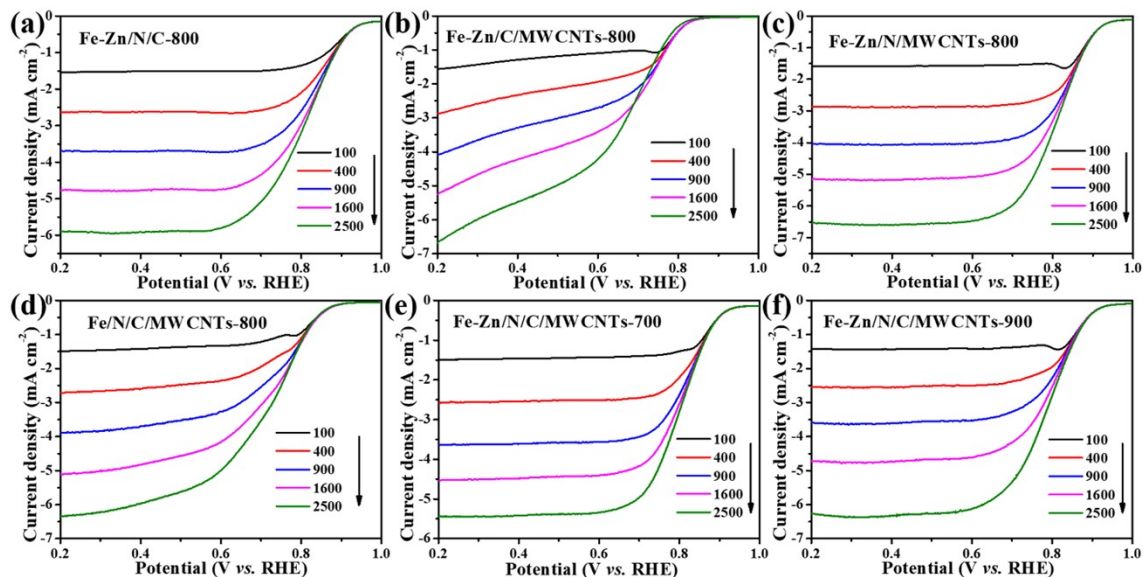

**Fig. S14.** LSV curves of (a) Fe-Zn/N/C-800, (b) Fe-Zn/C/MWCNTs-800, (c) Fe-Zn/N/MWCNTs-800, (d) Fe/N/C/MWCNTs-800, (e) Fe-Zn/N/C/MWCNTs-700, and (f) Fe-Zn/N/C/MWCNTs-900 at different rotation rates (from 100 rpm to 2500 rpm) with a scan rate of  $10 \text{ mV}\cdot\text{s}^{-1}$  in  $\text{O}_2$ -saturated 0.1 M KOH electrolyte.

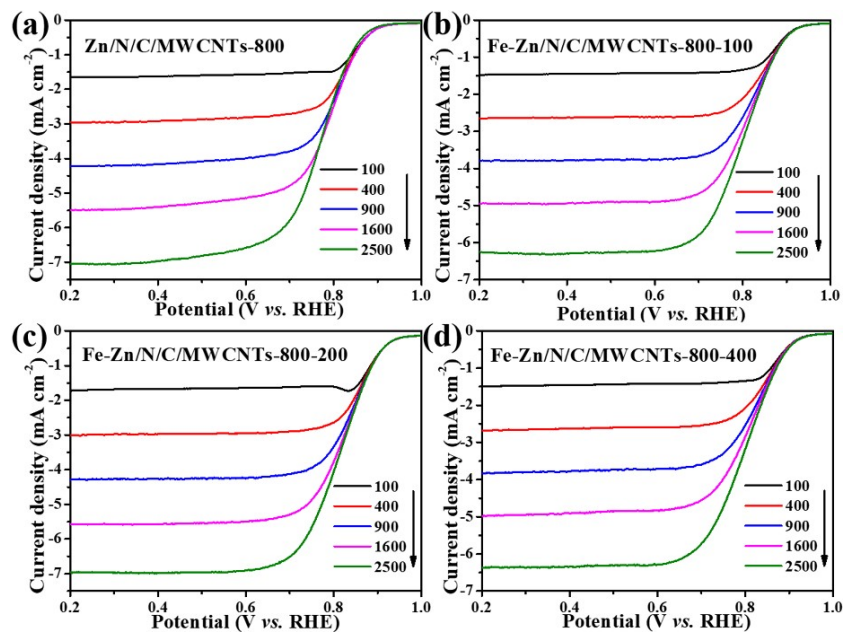

**Fig. S15.** LSV curves of (a) Zn/N/C/MWCNTs-800, (b) Fe-Zn/N/C/MWCNTs-800-100, (c) Fe-Zn/N/C/MWCNTs-800-200, and (d) Fe-Zn/N/C/MWCNTs-800-400 at different rotation rates (from 100 rpm to 2500 rpm) with a scan rate of  $10 \text{ mV}\cdot\text{s}^{-1}$  in  $\text{O}_2$ -saturated 0.1 M KOH electrolyte.

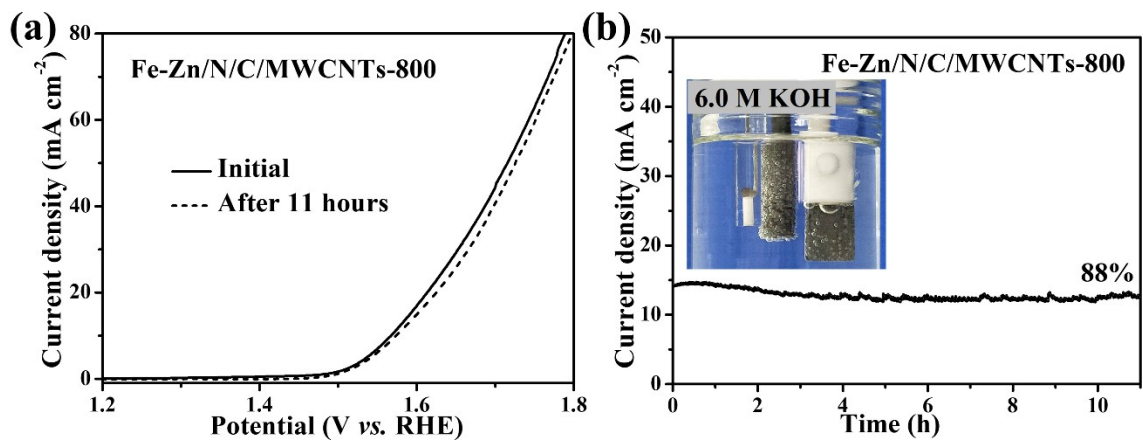

**Fig. S16.** (a) LSV curves of Fe-Zn/N/C/MWCNTs-800 catalyst before and after the stability testing toward OER. (b) Time-dependent current density curves of Fe-Zn/N/C/MWCNTs-800 on carbon paper for 11 hrs in 6.0 M KOH solutions.

**Table S1.** ICP-OES analysis results of the Fe-Zn/N/C/MWCNTs catalyst.

| Catalyst             | Fe (%) | Zn (%) |
|----------------------|--------|--------|
| Fe-Zn/N/C/MWCNTs-800 | 0.38   | 0.24   |

**Table S2.** The ORR parameters compared with state-of-the-art catalysts and the performance of Zn-air batteries in the literature.

| Catalysts                    | ORR                      | ZABs                                         |                  | Ref.      |
|------------------------------|--------------------------|----------------------------------------------|------------------|-----------|
|                              | $E_{1/2}$<br>(V vs. RHE) | Peak power density<br>(mW·cm <sup>-2</sup> ) | Stability<br>(h) |           |
| Fe-Zn/N/C/MWCNTs-800         | 0.858                    | 259                                          | 180              | This work |
| Fe-Zn-SA/NC                  | 0.85                     | 167.2                                        | 120              | [1]       |
| FeZnNC                       | 0.873                    | 170                                          | 110              | [2]       |
| Fe-N <sub>4</sub> SAs/NPC    | 0.885                    | 232                                          | 36               | [3]       |
| (Zn, Co)/NSC                 | 0.893                    | 150                                          | 22               | [4]       |
| CuZn/NC                      | 0.884                    | 164.3                                        | -                | [5]       |
| SA-Fe-NC                     | 0.88                     | 164                                          | 320              | [6]       |
| SA-Fe-NHPC                   | 0.93                     | 266.4                                        | 240              | [7]       |
| Fe@Fe <sub>SA</sub> -N-C-900 | 0.83                     | 110                                          | 500              | [8]       |
| FeCo SAs@Co/N-GC             | 0.88                     | 207                                          | 200              | [9]       |
| Fe, Co-SA/CS                 | 0.86                     | 86.65                                        | -                | [10]      |
| FeCo-1/NSC                   | 0.82                     | 162.74                                       | 150              | [11]      |
| FeCo-WC/NC                   | 0.85                     | 122.52                                       | 200              | [12]      |
| A-FeCo@NCNs                  | 0.87                     | 132                                          | -                | [13]      |
| FeCo-N-C                     | 0.904                    | 196.3                                        | 77               | [14]      |
| CoFe-NC                      | 0.94                     | 115                                          | 80               | [15]      |
| NiFe-DG                      | 0.86                     | 148                                          | -                | [16]      |
| Fe-Ni ANC@NSCA               | 0.891                    | 140.3                                        | 500              | [17]      |
| Fe-NiNC-50                   | 0.85                     | 220                                          | 100              | [18]      |
| FeNi0.25-NC                  | 0.86                     | 180                                          | 8                | [19]      |
| Fe, Mn/N-C                   | 0.928                    | 160.8                                        | 81               | [20]      |
| Fe/Mn-N <sub>x</sub> -C      | 0.88                     | 208.6                                        | 18               | [21]      |
| Fe, Mn, N-FGC                | 0.89                     | 220                                          | -                | [22]      |

## Supplementary References

- [1] J. Xu, S. Lai, D. Qi, M. Hu, X. Peng, Y. Liu, W. Liu, G. Hu, H. Xu, F. Li, C. Li, J. He, L. Zhuo, J. Sun, Y. Qiu, S. Zhang, J. Luo and X. Liu, *Nano Res.*, 2020, **14**, 1374-1381.
- [2] S. Yang, X. Xue, C. Dai, X. Liu, Q. Yin, J. Lian, Y. Zhao, Y. Bu and G. Li, *Appl. Surf. Sci.*, 2021, **546**, 148934.
- [3] Y. Pan, S. Liu, K. Sun, X. Chen, B. Wang, K. Wu, X. Cao, W.C. Cheong, R. Shen, A. Han, Z. Chen, L. Zheng, J. Luo, Y. Lin, Y. Liu, D. Wang, Q. Peng, Q. Zhang, C. Chen and Y. Li, *Angew. Chem. Int. Ed.*, 2018, **57**, 8614-8618.
- [4] D. Liu, B. Wang, H. Li, S. Huang, M. Liu, J. Wang, Q. Wang, J. Zhang and Y. Zhao, *Nano Energy*, 2019, **58**, 277-283.
- [5] D. Qi, Y. Liu, M. Hu, X. Peng, Y. Qiu, S. Zhang, W. Liu, H. Li, G. Hu, L. Zhuo, Y. Qin, J. He, G. Qi, J. Sun, J. Luo and X. Liu, *Small*, 2020, **16**, 2004855.
- [6] X. Liang, Z. Li, H. Xiao, T. Zhang, P. Xu, H. Zhang, Q. Gao and L. Zheng, *Chem. Mater.*, 2021, **33**, 5542-5554.
- [7] G. Chen, P. Liu, Z. Liao, F. Sun, Y. He, H. Zhong, T. Zhang, E. Zschech, M. Chen, G. Wu, J. Zhang and X. Feng, *Adv. Mater.*, 2020, **32**, 1907399.
- [8] W. Zhang, K. Fan, C.-H. Chuang, P. Liu, J. Zhao, D. Qi, L. Zong and L. Wang, *J. Energy Chem.*, 2021, **61**, 612-621.
- [9] N.K. Wagh, D.-H. Kim, S.-H. Kim, S.S. Shinde and J.-H. Lee, *ACS Nano*, 2021, **15**, 14683-14696.
- [10] V. Jose, H. Hu, E. Edison, W. Manalastas Jr., H. Ren, P. Kidkhunthod, S. Sreejith, A. Jayakumar, J.M.V. Nsanizimana, M. Srinivasan, J. Choi and J.-M. Lee, *Small Methods*, 2021, **5**, 2000751.
- [11] S. Chang, H. Zhang and Z. Zhang, *J. Energy Chem.*, 2021, **56**, 64-71.
- [12] L. Xu, S. Wu, D. Deng, C. Wang, J. Qian, G. Lu and H. Li, *J. Alloys Compd.*, 2021, **868**, 159236.
- [13] Y. Luo, J. Zhang, J. Chen, Y. Chen, C. Zhang, Y. Luo, G. Wang and R. Wang, *J. Catal.*, 2021, **397**, 223-232.
- [14] D. Wang, H. Xu, P. Yang, X. Lu, J. Ma, R. Li, L. Xiao, J. Zhang and M. An, *J. Mater. Chem. A*, 2021, **9**, 13678-13687.
- [15] K. Wang, J. Liu, Z. Tang, L. Li, Z. Wang, M. Zubair, F. Ciucci, L. Thomsen, J. Wright and N.M. Bedford, *J. Mater. Chem. A*, 2021, **9**, 13044-13055.
- [16] K. Khan, X. Yan, Q. Yu, S.-H. Bae, J.J. White, J. Liu, T. Liu, C. Sun, J. Kim, H.-M. Cheng, Y. Wang, B. Liu, K. Amine, X. Pan and Z. Luo, *Nano Energy*, 2021, **90**, 106488.
- [17] H. Li, X. Shu, P. Tong, J. Zhang, P. An, Z. Lv, H. Tian, J. Zhang and H. Xia, *Small*, 2021, **17**, 2102002.
- [18] X. Zhu, D. Zhang, C.-J. Chen, Q. Zhang, R.-S. Liu, Z. Xia, L. Dai, R. Amal and X. Lu, *Nano Energy*, 2020, **71**, 104597.
- [19] J. Liu, C. Fan, G. Liu and L. Jiang, *Appl. Surf. Sci.*, 2021, **538**, 148017.
- [20] G. Yang, J. Zhu, P. Yuan, Y. Hu, G. Qu, B.A. Lu, X. Xue, H. Yin, W. Cheng, J. Cheng, W. Xu, J. Li, J. Hu, S. Mu and J.N. Zhang, *Nat. Commun.*, 2021, **12**, 1734.
- [21] Z. Chen, X. Liao, C. Sun, K. Zhao, D. Ye, J. Li, G. Wu, J. Fang, H. Zhao and J. Zhang, *Appl. Catal. B*, 2021, **288**, 120021.
- [22] S. Sarkar, A. Biswas, T. Purkait, M. Das, N. Kamboj and R.S. Dey, *Inorg. Chem.*, 2020, **59**, 5194-5205.
